1 Challenges faced by Human Resources for Health in Morocco: a scoping review

2 Wafaa Al Hassani<sup>1</sup>, Youness El Achhab<sup>2,3</sup>, Chakib Nejjari<sup>3,4</sup>

3 <sup>1</sup> Euromed of Nursing Sciences and Health Technics, Euromed University of Fez, Fez,  
4 Morocco

5 <sup>2</sup> CRMEF Fez-Meknes, Fez, Morocco

6 <sup>3</sup> Department of Epidemiology, Clinical Research and Community Health, Faculty of  
7 Medicine, Dental Medicine and Pharmacy of Fez, Fez, Morocco

8 <sup>4</sup> Euromed Research Center, Euromed University of Fez, Fez, Morocco

9

10 **Corresponding author:**

11 EL ACHHAB Youness

12 Laboratory of Epidemiology, Clinical Research and Community Health, Faculty of Medicine,  
13 Dental Medicine and Pharmacy of Fez; B.P 1893, Km 2.2 Route Sidi Harazem, Fez 30000,  
14 Morocco.

15 E-mail: youness\_elachhab@yahoo.fr; Mobile: +212 650 152 084 ; Fax: +212 35 619 321

16 **Abstract**

17 **Background:** Human resources for health (HRH) play a pivotal role in effective health  
18 system operation, yet various impediments challenge sustainable development. This scoping  
19 review aimed to explore these challenges and potential solutions in aligning the health  
20 workforce to meet the evolving healthcare needs of the Moroccan population.

21 **Methods:** We conducted a scoping review searching PubMed, Science Direct, Cairn and  
22 Google Scholar for relevant articles published between 2014 and 2023. Additionally, non-  
23 peer-reviewed literature sourced from Ministry of Health consultations and allied websites  
24 was included.

25 **Results:** Among the nineteen studies meeting our inclusion criteria, the majority were cross-  
26 sectional and predominantly focused on challenges faced by nurses. While some papers  
27 delineated multiple HRH challenges (5/19), the rest addressed specific challenges. The  
28 identified challenges span organizational and personal levels. Organizationally, the focus was  
29 on training, lifelong learning, continuing education, health coverage and shortages, and job  
30 satisfaction. At a personal level, HRH in the public health sector encountered challenges such  
31 as burnout, stress, and broader occupational health concerns.

32 **Conclusions:** The reviewed publications underscored a spectrum of challenges necessitating  
33 robust policy interventions. Despite promising developments in the Moroccan healthcare  
34 system, addressing the unequal urban-rural HRH distribution, augmenting funding, and  
35 enhancing HRH quality of life stand as pivotal imperatives.

36 **Keywords:** Challenges, Human resources for health, Scoping review, Morocco

## 37 **Introduction**

38 Human resources for health (HRH) serve as a linchpin for robust health systems  
39 worldwide, yet multiple challenges impede their sustainable development [1-5]. In 2016, the  
40 World Health Assembly introduced the Global Strategy on Human Resources for Health:  
41 Workforce 2030, aimed at expanding the availability, accessibility, acceptability, coverage,  
42 and quality of HRH. This strategy stands as a critical step toward achieving universal health  
43 coverage and the Sustainable Development Goals [5].

44 Recent progress in research has delved into various facets of HRH, examining  
45 governance, training, performance, recruitment strategies, motivation, and distribution [6-11].  
46 Systematic reviews play a pivotal role in visualizing this evidence for policymakers. They  
47 consolidate research, shedding light on key issues affecting the health workforce within a  
48 robust health system [12-13]. Such reviews not only highlight areas with existing evidence  
49 but also pinpoint those necessitating more attention. Ultimately, fostering a synergistic  
50 interaction between researchers and policymakers through these systematic reviews facilitates  
51 the translation process within HRH policymaking. This collaborative approach aims to bridge  
52 the gap between research insights and policy implementation.

53 Morocco's healthcare system is integral to the well-being of its populace, yet it  
54 grapples with a myriad of challenges, as do many nations [14]. Despite notable strides in  
55 recent years, this system confronts ongoing hurdles that demand readiness from healthcare  
56 professionals. The Human Resources for Health (HRH) sector stands as a critical pillar within  
57 this system, encompassing healthcare professionals, support staff, and administrators. The  
58 Joint Learning Initiative on HRH emphasizes the significance of investing in HRH as a means  
59 to explicitly elevate national income per capita and alleviate absolute poverty [15]. Moreover,  
60 participants from diverse backgrounds at the fifth Global Forum on HRH in 2023 underscored

61 the imperative of safeguarding, protecting, and investing in the health and care workforce  
62 [16].

63 This paper delineates the outcomes of an initiative aimed at investigating challenges  
64 and potential solutions to optimize the health workforce. Through an extensive literature  
65 review, the objective was to align the health workforce with the evolving healthcare  
66 requirements of the Moroccan population.

## 67 **Methods**

### 68 *Data sources and search strategy*

69 Adhering to the framework outlined by Arksey and O'Malley [17], as updated by  
70 Levac et al. [18], we undertook a scoping review of the literature. Our aim was to delve into  
71 the challenges and potential solutions concerning the optimization of the health workforce in  
72 Morocco. Initially, the research question was formulated through consultations with an expert  
73 panel comprising members from the health ministry, an EMRO representative, and a  
74 researcher equipped with formal information management training. To establish relevant  
75 search criteria, keywords were identified based on these research inquiries and insights  
76 provided by the expert panel. Furthermore, the summary and reporting of this scoping review  
77 were done using the checklist for the Preferred Reporting Items for Systematic Reviews and  
78 Meta-Analyses extension for Scoping Reviews (PRISMA-ScR) [19]. Ethical approval was not  
79 deemed necessary for this review since the findings were derived from existing and publicly  
80 available literature.

81 We conducted searches on electronic databases including PubMed, ScienceDirect, and  
82 Google Scholar up to November 2, 2023, to identify pertinent articles published between  
83 2014 and 2023. Our search encompassed English and French articles, reviews, abstracts, case

84 reports, letters to the editor, and other academic reports. Additionally, to augment our search,  
85 we performed a backward citation analysis of relevant papers and incorporated  
86 recommendations provided by our expert panel.

87 The following key words were identified and used in various combinations with  
88 Boolean operators (and, or): health human resources, health care delivery, health workforce,  
89 health professionals, healthcare providers, personnel, nurses, doctors, shortage, challenges,  
90 barriers, opportunities, satisfaction, stress, burnout, occupational health, Morocco.

91 A three-stage method was adopted to select publications for review. In the first, the  
92 title alone was examined, followed by looking at the abstract, and then examining the whole  
93 publication. The search and review results are shown in Fig 1. Articles were excluded if they  
94 did not refer to a HRH, or if did not address a challenge context. All documents relevant to  
95 the COVID-19 pandemic were excluded from this scoping review. If articles were  
96 representative of the inclusion criteria, the documents went through two full-text independent  
97 reviews by the two authors.

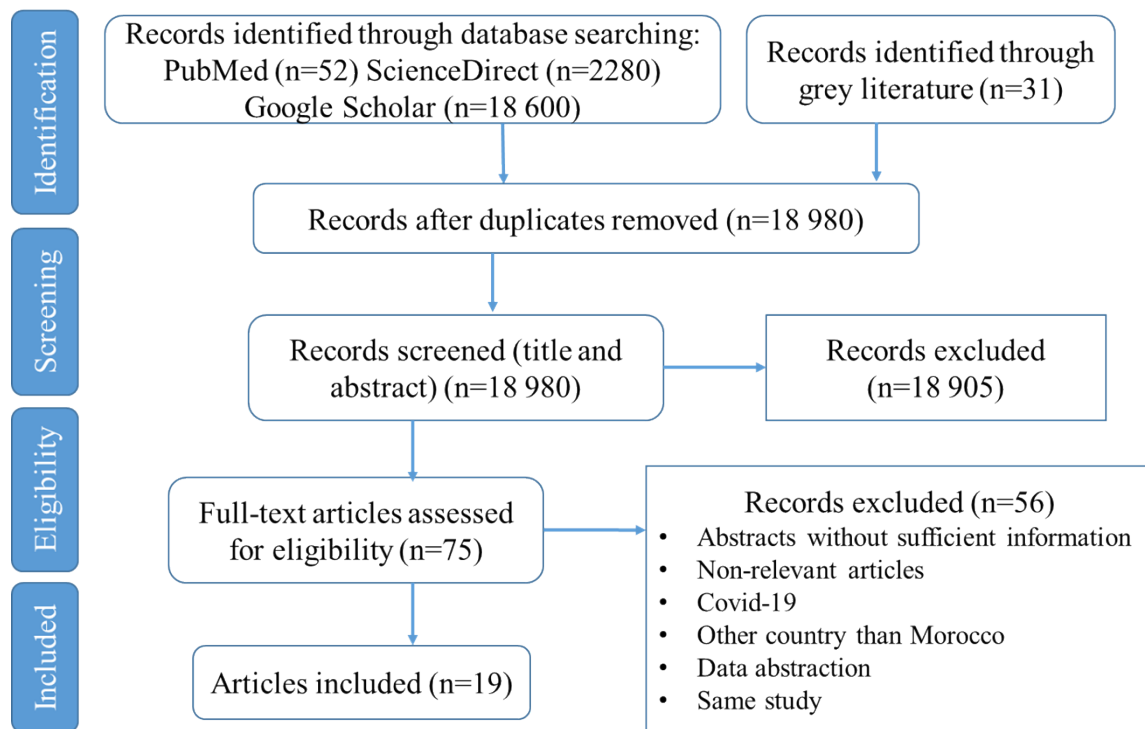

98

99

**Fig 1. PRISMA flowchart for the study selection process**

### 100 ***Quality assessment***

101 To assess the literature quality, parts of the method presented by Hölbl *et al.* [20] were  
102 used and modified as appropriate. The reviewers checked three considerations about  
103 relevance to HRH and challenges and appropriateness of research objectives.

### 104 ***Data extraction***

105 The research team extracted data for each selected article according to the following  
106 domains: author(s) name, year of publication, study design and sample size, type of HRH,  
107 type of document (peer-reviewed or gray), setting, HRH challenge, main findings, and  
108 proposed solutions or recommendations. Data analysis was completed in Microsoft Excel.

### 109 **Results**

110 The selection process is shown in Fig 1. Initially, 18,980 titles were identified through  
 111 database searches and other sources. Following the screening of titles and abstracts, 75 studies  
 112 underwent full-text review. Ultimately, 19 studies met the criteria for inclusion in this scoping  
 113 review. These studies spanned a 10-year range, with the earliest publication dating back to  
 114 2014. Interest in challenges encountered by healthcare providers notably surged between 2017  
 115 and 2023.

116 The data extracted from the included studies are presented in Table 1. The majority of  
 117 publications (15 out of 19) underwent peer review. Among the included studies, half were  
 118 designed as quantitative cross-sectional (9 out of 19), while four studies adopted a mixed-  
 119 method approach. Primarily, the focus of most studies was on regional challenges (13 out of  
 120 19), with four reports and two articles examining challenges at a national level. However, four  
 121 publications did not specify the region of their studies. While the majority of studies reported  
 122 challenges faced by medical professionals, paramedics, and assistants, four studies  
 123 specifically addressed challenges within one target population, namely nurses.

124 **Table 1. Characteristics of studies selected for inclusion**

| Source                         | Study design                       | Participants                                    | Publication   | Setting                                                       |
|--------------------------------|------------------------------------|-------------------------------------------------|---------------|---------------------------------------------------------------|
| Elkachradi et al. (2023) [27]  | Qualitative (48 interviews)        | Nurses                                          | Peer-reviewed | 3 Public hospitals                                            |
| Fattahi et al. (2023) [36]     | Cross-sectional study (n=2174)     | Medical, Paramedical, Admin & Assistants        | Peer-reviewed | Public health structures in Drâa-Tafilalet region             |
| Dankoly et al. (2023) [21]     | Qualitative (8 focus groups)       | Doctors and nurses caring for diabetes patients | Peer-reviewed | 8 primary healthcare centers urban and rural regions in Oujda |
| Mansoury et al. (2023) [37]    | Cross-sectional study (n=191)      | Physicians and nurses                           | Peer-reviewed | Marrakech University Hospital                                 |
| El Mouaddib et al. (2023) [30] | Cross-sectional study (n=346)      | Nurses, GPs and specialists                     | Peer-reviewed | Marrakech public health centers                               |
| Koubri et al. (2022) [31]      | Mixed study (n=272; 18 interviews) | Primary healthcare providers and                | Peer-reviewed | Primary healthcare facilities in the Rabat Salé Kénitra       |

|                                |                                                                                 | officials                                                            |               | region                                         |
|--------------------------------|---------------------------------------------------------------------------------|----------------------------------------------------------------------|---------------|------------------------------------------------|
| Hababa et al. (2021) [24]      | Case study                                                                      | Medical, Paramedical, Admin & Assistants                             | Peer-reviewed | Marrakech-Safi regional directorate of health  |
| Belrhiti et al. (2020) [6]     | Multiple embedded case study design (interviews, FG, documents and observation) | Officials, doctors, nurses & administrators                          | Peer-reviewed | 4 Public hospitals                             |
| El Azizi et al. (2019) [33]    | Cross-sectional study (n=80)                                                    | Nurses                                                               | Peer-reviewed | Hospital Hassan II of Settat                   |
| Barich et al. (2019) [25]      | Curriculum analysis                                                             | Nurses                                                               | Peer-reviewed | ISPITS of Rabat                                |
| Gouifrane et al. (2018) [26]   | Cross-sectional study (n=129)                                                   | Nurses                                                               | Peer-reviewed | Ibn-Rochd Hospital Casablanca                  |
| Ministry of health (2018) [32] | Cross-sectional study (n=2122)                                                  | All HRH                                                              | Report        | National                                       |
| Chtibi et al. (2018) [38]      | Cross-sectional study (n=100)                                                   | Physicians and nurses                                                | Peer-reviewed | Ibn Sina Hospital in Rabat                     |
| Laraqui et al. (2017) [35]     | Cross-sectional study (n=1951)                                                  | Doctors, nurses & Assistants                                         | Peer-reviewed | 3 Public hospitals                             |
| Ministry of health (2017) [28] | Mixed survey (quantitative, document analysis & interviews)                     | All HRH                                                              | Report        | National health institutions                   |
| Ministry of health (2017) [23] | Qualitative                                                                     | All HRH                                                              | Report        | National health institutions                   |
| Giurgiu et al. (2015) [34]     | Cross-sectional study (n=2863)                                                  | All HRH                                                              | Peer-reviewed | Public hospitals from north, center and south. |
| Zouag et al. (2015) [29]       | Simulation                                                                      | Doctors                                                              | Report        | National                                       |
| El Kirate & Filali (2014) [22] | Multiple embedded case study design (interviews)                                | Mental health practitioners, senior managers and psychiatry teachers | Peer-reviewed | Health institutions in Rabat                   |

125

126 Table 2 outlines the challenges encountered by HRH along with proposed solutions  
127 derived from the included studies. While five papers highlighted multiple challenges faced by  
128 HRH, the remaining addressed specific challenges. Notably, two papers delineated barriers



129 within distinct departments: the first focused on managing type 2 diabetes [21], while the  
130 second discussed challenges within the mental health system [22].

131 Across the included studies, a spectrum of challenges confronted by HRH emerged  
132 within both regional and national healthcare sectors. These challenges were categorized into  
133 two levels:

#### 134 ***Organizational level***

135 The most frequently reported HRH challenge in the Moroccan context was training,  
136 lifelong learning, and continuing education, highlighted in five papers. The Ministry of Health  
137 study [23] revealed that continuous training remains significantly limited due to an  
138 unstructured system and constrained by insufficient funding. The recommendation from this  
139 study emphasizes the necessity of implementing an efficient and coherent organization for  
140 continuing education while enhancing the pursuit of quality and attractiveness to strengthen  
141 its effectiveness.

142 Responding to the Ministry of Health's call for continuous training (outlined in the  
143 national strategy of continuous training 2019-2021), the regional directorate of health in  
144 Marrakech-Safi devised its regional plan in 2019 [24]. The study demonstrated that  
145 participants acquired skills and effectively applied them in practical settings. Among the  
146 remaining three papers, all centered on nurses' training. One study highlighted the need for a  
147 secondary reform in the training curriculum [25], while another focused on the inadequacy of  
148 motivation for continuous training [26]. Regarding lifelong learning, Elkachradi et al.  
149 reported that all healthcare professionals interviewed recognized the importance of training in  
150 delivering quality and safe care [27].

151

152 **Table 2. Distribution of the challenges reported in the includes studies**

| Source                         | Participants                                    | Challenges                                        | Main results                                                                                                                                                                                                     | Proposed solutions                                                                                                                                                                                     |
|--------------------------------|-------------------------------------------------|---------------------------------------------------|------------------------------------------------------------------------------------------------------------------------------------------------------------------------------------------------------------------|--------------------------------------------------------------------------------------------------------------------------------------------------------------------------------------------------------|
| Elkachradi et al. (2023) [27]  | Nurses                                          | Lifelong learning                                 | Only a quarter of the interviewed caregivers comprehend “lifelong learning”. However, all of them acknowledge “continuous learning” particularly amidst prolonged uncertainty, within Moroccan public hospitals. | raise awareness about structuring lifelong professional training while integrating a knowledge management approach                                                                                     |
| Fattahi et al. (2023) [36]     | Medical, Paramedical, Admin & Assistants        | Burnout syndrome                                  | prevalence rate of burnout (57.7%). Highly stressful working conditions.                                                                                                                                         | Improve working conditions and financial motivation of public health professionals                                                                                                                     |
| Dankoly et al. (2023) [21]     | Doctors and nurses caring for diabetes patients | T2D management barriers                           | Excessive workload, poor reimbursement policy, shortage, poor working environment, limited referral, gap in the knowledge of general practitioner.                                                               | Staff recruitment; continuous professional development; internships.                                                                                                                                   |
| Mansoury et al. (2023) [37]    | Physicians & nurses                             | Burnout syndrome                                  | High degree of emotional exhaustion (60%). High degree of depersonalization. Low degree of personal accomplishment (73%).                                                                                        | Improve working conditions by reduction workload. Increase motivation and lifelong professional training.                                                                                              |
| El Mouaddib et al. (2023) [30] | Nurses, GPs and specialists                     | Job satisfaction                                  | Presence of dissatisfaction among HCPs regarding various aspects of their jobs.                                                                                                                                  | Clarify the tasks of all professional categories, grant them more autonomy, establish career paths for the promotion and professional development, improve working conditions, and promote incentives. |
| Koubri et al. (2022) [31]      | Primary healthcare providers and officials      | Satisfaction with organization of health services | Presence of dissatisfaction among HCPs regarding organization of health services. 75% of the providers expressed their full agreement in reorienting PHC                                                         | Provision of sufficient and qualified human resources, to be able to develop person-centered health services. Implementing family health as a new paradigm for the                                     |

|                                |                                             |                                       |                                                                                                                                                                                                                                    |                                                                                                                                                                                                                                 |
|--------------------------------|---------------------------------------------|---------------------------------------|------------------------------------------------------------------------------------------------------------------------------------------------------------------------------------------------------------------------------------|---------------------------------------------------------------------------------------------------------------------------------------------------------------------------------------------------------------------------------|
|                                |                                             |                                       | facilities towards the person-centered approach.                                                                                                                                                                                   | organization of health services.                                                                                                                                                                                                |
| Hababa et al. (2021) [24]      | Medical, Paramedical, Admin & Assistants    | Continuing education                  | Success of the regional continuing education plan for professionals in the Marrakech-Safi region 2019-2021. The participants acquired skills and succeeded in transferring what they acquired in the field.                        | Developing HRH capacities and improving the performance of the healthcare system.                                                                                                                                               |
| Belrhiti et al. (2020) [6]     | Officials, doctors, nurses & administrators | Public service motivation             | Complex leadership styles can increase public service motivation, organizational commitment and extra role behaviors by increasing perceived supervisor and organizational support and satisfying staff basic psychological needs. | In hospitals, the archetype of complex professional bureaucracies, leaders need to be able to balance between different leadership styles according to the staff's profile, the nature of tasks and the organizational culture. |
| El Azizi et al. (2019) [33]    | Nurses                                      | Evidence-based nursing practice       | Organizational barriers, barriers related to nurses' personal characteristics, research barriers, and institutional barriers.                                                                                                      | Increase motivation and lifelong professional training. Ensuring access to information sources (scientific databases).                                                                                                          |
| Barich et al. (2019) [25]      | Nurses                                      | Nursing training                      | Theoretical courses predominate for all sectors. Objective-based approach instead of skills-based approach. Insufficient time for training.                                                                                        | Need of a second reform referring to the required standards and the specificities of training in nursing and health techniques.                                                                                                 |
| Gouifrane et al. (2018) [26]   | Nurses                                      | Motivation for continuous training    | Level of motivation for continuous training (64%). Extrinsic motivation exceeds intrinsic motivation.                                                                                                                              | None                                                                                                                                                                                                                            |
| Ministry of health (2018) [32] | All HRH                                     | Satisfaction, engagement & motivation | Lack of satisfaction (64%). Excess of workload (75%). Stress (75%). 68% unsatisfied                                                                                                                                                | Optimal and appropriate sizing of resources reduces overload and improves                                                                                                                                                       |

|                                |                              |                                        |                                                                                                                                                                                                                                         |                                                                                                                                                                                                           |
|--------------------------------|------------------------------|----------------------------------------|-----------------------------------------------------------------------------------------------------------------------------------------------------------------------------------------------------------------------------------------|-----------------------------------------------------------------------------------------------------------------------------------------------------------------------------------------------------------|
|                                |                              |                                        | from remuneration. 78% satisfied from motivation of their leaderships. Need of continuous training (64%).                                                                                                                               | the working climate. Ad hoc support structures and innovative solutions contribute to coping with stress.                                                                                                 |
| Chtibi et al. (2018) [38]      | Physicians & nurses          | Stress and Burnout                     | Emotional exhaustion (42%), depersonalization (49%), low professional achievement (67%), and psychological distress (54%). The stress test reveals that 88% of subjects have a low or moderate level of stress resistance.              | None                                                                                                                                                                                                      |
| Laraqui et al. (2017) [35]     | Doctors, nurses & Assistants | Well-being and occupational perception | Medication use consisted of analgesics (28.1%) and psychotropic (11.6%). Bad general health perception (38.6%). Pain and headache were the most common symptoms. 53.9% experienced stress at work. Difficult work requirements (78.3%). | Assessing the well-being, working conditions and perceived occupational hazards of healthcare staff should be a priority for occupational health departments in Moroccan hospitals.                       |
| Ministry of health (2017) [28] | All HRH                      | Continuing training                    | Diagnosis: Continuing training is very limited, based on an unstructured system and hampered by the lack of funding.                                                                                                                    | Deploy an efficient and coherent organization for continuing education. strengthen skills to support the Ministry of Health's 2017-2021 sector strategy                                                   |
| Ministry of health (2017) [23] | All HRH                      | Health coverage                        | Insufficient stock of healthcare workers. Scarce information on dynamics of the healthcare labor market. Maldistribution of healthcare personnel. Insufficient training to guarantee the quality of                                     | Increase the availability of HRH according to the service needs. Achieve universal coverage especially in regions with deficits. Design and implement strategies to improve the technical quality of HRH. |

|                                |                                                                      |                                              |                                                                                                                                                                                                                                                                    |                                                                                                                                                          |
|--------------------------------|----------------------------------------------------------------------|----------------------------------------------|--------------------------------------------------------------------------------------------------------------------------------------------------------------------------------------------------------------------------------------------------------------------|----------------------------------------------------------------------------------------------------------------------------------------------------------|
|                                |                                                                      |                                              | services.                                                                                                                                                                                                                                                          |                                                                                                                                                          |
| Giurgiu et al. (2015) [34]     | All HRH                                                              | Occupational risk perception                 | Shortage in doctors and nurse staff. Aggression, workload, stress, and musculoskeletal disorders. HCWs took more hypnotics, sedatives and analgesics (40 %).                                                                                                       | Urgent need of implementing a risk prevention plan and even a hospital reform.                                                                           |
| Zouag et al. (2015) [29]       | Doctors                                                              | Shortage                                     | The baseline scenario shows already important deficits in medical doctors in Morocco for the coming years. This can only increase under the current emigration flows and the retirement rates.                                                                     | The cooperative frameworks with other countries and mainly EU could be an important source for satisfying both the needs of the EU and those of Morocco. |
| El Kirate & Filali (2014) [22] | Mental health practitioners, senior managers and psychiatry teachers | Challenges faced by the mental health system | Lack of communication, collaboration and updated knowledge especially concerning diagnosis, psychotropic drug prescriptions and addiction medicine. Need of specific training in mental health specialists, such as geriatric psychiatry and pediatric psychiatry. | Better training in these areas would contribute to the success of managed care strategies in primary healthcare facilities.                              |

153

154 Two studies identified health coverage and shortages as key challenges. The first  
155 study, conducted by the Ministry of Health [28], highlighted an inadequate stock of healthcare  
156 workers that does not align with health service needs. Additionally, it noted an imbalanced  
157 distribution of healthcare personnel concerning the geographical spread of the population and  
158 its epidemiological profile. The second study, by Zouag et al. [29], focused on forecasting

159 shortages through simulation for the period 2010-2030. It projected a significant deficit in  
160 medical doctors in Morocco in the upcoming years. This shortage could further escalate due  
161 to current emigration trends and retirement rates.

162 Three studies shed light on job satisfaction as a noteworthy challenge, characterized  
163 by a complex interplay of factors that might vary based on the specific group under study.  
164 Overall, dissatisfaction among healthcare providers is prevalent, encompassing various facets  
165 of their roles [30-32].

166 Belrhiti et al.'s study [6] highlights that enhancing public service motivation,  
167 organizational commitment, and extra-role behaviors could be achieved by amplifying  
168 perceived supervisor and organizational support, along with fulfilling staff's basic  
169 psychological needs. El Azizi and El Goundali's research [33] focuses on delineating barriers  
170 to the integration of evidence-based practices in nursing. It identifies four categories of  
171 barriers that could potentially underlie reluctance towards evidence-based practice.

## 172 *Personal level*

173 Two studies focused on occupational health highlighted that healthcare workers in  
174 Moroccan hospitals tend to use more hypnotics, sedatives, and analgesics [34,35]. Urgent  
175 recommendations emerge from these findings, emphasizing the crucial need to assess the  
176 well-being, working conditions, and perceived occupational hazards among healthcare staff.

177 Additionally, two studies underscored the heavy workload experienced within  
178 Morocco's public hospitals, contributing to stress and burnout among healthcare professionals  
179 [36,37]. Another study aimed to scrutinize the relationship between resistance status, burnout,  
180 and levels of psychological distress [38], revealing that 88% of subjects demonstrated a low  
181 or moderate level of stress resistance. Most studies included in this analysis corroborate this

182 stressful scenario and advocate for improving working conditions, as well as promoting  
183 incentives and compensation.

## 184 **Discussion**

185 This scoping review delved into the challenges confronting HRH within the  
186 workforce, as identified in both scientific and grey literature. The study's robustness lies in its  
187 rigorous inclusion criteria and the guidance provided by a panel of experts in shaping the  
188 approach to the subject. Notably, nurses emerged as more prominently featured among all  
189 professions within the reviewed literature. However, several selected publications  
190 encompassed all health professions, primarily due to the comprehensive nature of challenges  
191 examined, especially those concerning national health policies.

192 While a majority of the included studies relied on quantitative methods, the utilization  
193 of mixed methods presents an opportunity for triangulating findings. This approach can enrich  
194 the contextual understanding of challenges and aid in crafting specific recommendations.  
195 Within the body of knowledge on HRH challenges in this scoping review, empirical research  
196 takes precedence. Our findings underscore the tendency of empirical studies to concentrate on  
197 specific challenges rather than providing a holistic overview. Indeed, the results gleaned from  
198 these publications emphasize that challenges are interconnected and often overlap.

199 Our findings underscore that the most extensively studied challenges since 2014  
200 predominantly align with organizational and personal spheres. Organizational challenges  
201 encompass four primary areas: training, lifelong learning, and continuing education; health  
202 coverage and shortages; and job satisfaction. Meanwhile, at the personal level, HRH in the  
203 public health sector face challenges including burnout, stress, and broader issues related to

204 occupational health. It's noteworthy that this scenario is not unique to Moroccan HRH but is  
205 mirrored in numerous countries worldwide [39-42].

206 In our digital society, health systems encounter significant challenges, prompting the  
207 need to reform models rooted in the industrial age [43]. Responding to a dynamic and  
208 complex global environment, the World Health Organization has introduced the 'Human  
209 Resources for Health 2030 strategy' as a new global paradigm [44]. Central to the realization  
210 of this vision is the development of a novel regulatory model. To modernize its regulatory  
211 framework, the Moroccan Ministry of Health has devised new strategies in collaboration with  
212 the WHO [6,14,45].

213 The pressing demand to train more healthcare providers to address an estimated  
214 shortfall of 18 million, primarily in low- and middle-income countries, presents a critical  
215 challenge for health policymakers [5]. One promising strategy to augment the number of  
216 medical professionals involves reforming admission and training practices in medical  
217 education [46-48]. The focus on training and the future prospects of the health workforce for  
218 the 2010-2030 period, as studied by Zouag et al. [29], emphasizes the necessity for enhanced  
219 cooperation in healthcare, particularly emphasizing medical education and research. Notably,  
220 a study on development assistance for HRH [49] highlighted a significant portion of support  
221 directed toward HRH-related training activities between 2016 and 2019.

222 Following the structuring of continuing training by the Moroccan Ministry of Health  
223 [23], local health directorates have devised their strategies. The study conducted by Hababa et  
224 al. [24] showcased the effectiveness of a training program executed in 2019 in bolstering  
225 HRH skills. Moreover, healthcare professionals view lifelong learning as an ongoing and  
226 indispensable process for their work [27,50]. Furthermore, a well-trained HRH is an  
227 indispensable element for the success of any healthcare system [51].



228           This new era is marked by significant transitions, including epidemiologic shifts and a  
229 redistribution of the disability burden [4]. These changes significantly impact healthcare  
230 systems, the roles of HRH, and educational policies [52,53]. Such transitions further  
231 exacerbate the prevalent global shortage and uneven distribution of HRH [1,4].

232           In Morocco, the Ministry of Health conducted a national study on health coverage  
233 [28], revealing an inadequate supply of healthcare workers that doesn't align with health  
234 service needs. Additionally, there's an imbalanced distribution of healthcare personnel  
235 concerning the geographical spread of the population and its health profile. The shortage is  
236 compounded by HRH emigration. A recent WHO report indicated that the escalating demand  
237 for healthcare providers in developed countries might heighten vulnerabilities in nations  
238 already grappling with low health workforce densities [54]. In response, a study in Morocco  
239 recommends enhancing working conditions, improving training quality, and revisiting HRH  
240 salaries to mitigate medical student migration [55].

241           The satisfaction of health professionals with their jobs significantly influences HRH  
242 performance and the quality of healthcare services [56,57]. Within this scoping review,  
243 dissatisfaction among health professionals across various job aspects is evident [30-32].  
244 Globally, particularly in developing nations, several factors contribute to this decreased job  
245 satisfaction among health professionals. Management and leadership, working conditions,  
246 staff relations and patient care, responsibility, and workload emerge as key factors linked to  
247 job satisfaction [57-59].

248           Introducing effective interventions has shown promise in enhancing nurses' job  
249 satisfaction and curbing employee turnover [56,57,60]. Additionally, factors such as job  
250 security, recognition, respect, financial independence, and competitive salaries are reported in  
251 the literature to heighten HRH motivation [61]. Notably, in a national survey of US

252 physicians, intrinsic motivational factors were associated with physicians' career enjoyment,  
253 life satisfaction, and commitment to clinical practice [62].

254 According to several studies [60,63-65], job satisfaction has been found to correlate  
255 with stress levels and the incidence of burnout symptoms within work environments. Stress  
256 represents a universal element in the job of healthcare professionals [66]. Chronic  
257 occupational stress, heavy workloads, and imbalances between job demands and resources are  
258 primary contributors to HRH burnout [67,68].

259 A meta-analysis of 47 studies revealed that physician burnout increased the risk of  
260 medical errors and led to diminished overall care quality and patient satisfaction [69].  
261 However, findings from a review and meta-analysis underscored the effectiveness of  
262 cognitive, behavioral, and mindfulness-based approaches in reducing stress levels and burnout  
263 among HRH [70]. In our context, studies advocate for enhancing working conditions and  
264 providing better financial motivation for public health professionals to mitigate stress and  
265 burnout [36,37].

## 266 ***Limitations***

267 This scoping review bears certain limitations. Firstly, the internal and external validity  
268 of the findings might hinder their generalizability to the entire HRH spectrum. The risk of  
269 selection bias is a possibility, as only two researchers conducted and agreed upon the database  
270 selection. Moreover, the majority of studies included in this review primarily originated from  
271 major cities or prominent regions, potentially limiting the diversity and representation of  
272 HRH experiences across various settings. Secondly, the predominance of cross-sectional  
273 studies focused predominantly on nurses within HRH, along with disparities in sample sizes

274 and variations in the measurement tools used to assess challenges, could impact the broader  
275 applicability of the findings.

## 276 **Conclusion**

277 This scoping review gathered pertinent documents to offer insights into the prevailing  
278 challenges within HRH in Morocco. The identified publications delineated a diverse array of  
279 challenges that necessitate robust policy interventions. Despite recent strides in the Moroccan  
280 healthcare system, tackling the disparities in HRH distribution between urban and rural areas,  
281 augmenting funding, and enhancing the quality of life for HRH remain pivotal. This requires  
282 concerted efforts towards strategic planning for staff training, coupled with the  
283 implementation of improved HR management practices and enhanced motivation within  
284 regional public health institutions.

## 285 **References**

- 286 1. Boniol M, Kunjumen T, Nair TS, Siyam A, Campbell J, Diallo K. The global health  
287 workforce stock and distribution in 2020 and 2030: a threat to equity and ‘universal’ health  
288 coverage? *BMJ Glob Health*. 2022;7(6):e009316.
- 289 2. Okunogbe A, Bowser D, Gedik G, Naseri S, Abu-Agla A, Safi N. Global Fund  
290 financing and human resources for health investments in the Eastern Mediterranean Region.  
291 *Hum Resour Health*. 2020;18(1):48.
- 292 3. Campbell J, Dussault G, Buchan J, Pozo-Martin F, Guerra Arias M, Leone C, et al. A  
293 Universal Truth: No Health Without A Workforce [Internet]. Recife, Brazil: Geneva, Global  
294 Health Workforce Alliance and World Health Organization; 2013 [cited 2023 Sep 23] p. 104.  
295 Available from: [https://www.who.int/publications/m/item/hrh\\_universal\\_truth](https://www.who.int/publications/m/item/hrh_universal_truth)
- 296 4. Crisp N, Chen L. Global Supply of Health Professionals. *N Engl J Med*.  
297 2014;370(10):950–7.
- 298 5. World Health Organization. Global strategy on human resources for health: workforce  
299 2030 [Internet]. Geneva: World Health Organization; 2016 [cited 2023 Nov 7]. 64 p.  
300 Available from: <https://iris.who.int/handle/10665/250368>

- 301 6. Belrhiti Z, Van Damme W, Belalia A, Marchal B. The effect of leadership on public  
302 service motivation: a multiple embedded case study in Morocco. *BMJ Open*.  
303 2020;10(1):e033010.
- 304 7. Effa E, Arikpo D, Oringanje C, Udo E, Esu E, Sam O, et al. Human resources for  
305 health governance and leadership strategies for improving health outcomes in low- and  
306 middle-income countries: a narrative review. *J Public Health Oxf Engl*. 2021;43(Suppl  
307 1):i67–85.
- 308 8. Negero MG, Sibbritt D, Dawson A. How can human resources for health interventions  
309 contribute to sexual, reproductive, maternal, and newborn healthcare quality across the  
310 continuum in low- and lower-middle-income countries? A systematic review. *Hum Resour*  
311 *Health*. 2021;19(1):54.
- 312 9. Rowe AK, Rowe SY, Peters DH, Holloway KA, Chalker J, Ross-Degnan D.  
313 Effectiveness of strategies to improve health-care provider practices in low-income and  
314 middle-income countries: a systematic review. *Lancet Glob Health*. 2018;6(11):e1163–75.
- 315 10. Sonderegger S, Bennett S, Sriram V, Lalani U, Hariyani S, Robertson T. Visualizing  
316 the drivers of an effective health workforce: a detailed, interactive logic model. *Hum Resour*  
317 *Health*. 2021;19(1):32.
- 318 11. Witter S, Hamza MM, Alazemi N, Alluhidan M, Alghaith T, Herbst CH. Human  
319 resources for health interventions in high- and middle-income countries: findings of an  
320 evidence review. *Hum Resour Health*. 2020;18(1):43.
- 321 12. Aromataris E, Pearson A. The systematic review: an overview. *Am J Nurs*.  
322 2014;114(3):53–8.
- 323 13. Smela B, Toumi M, Świerk K, Gawlik K, Clay E, Boyer L. Systematic literature  
324 reviews over the years. *J Mark Access Health Policy*. 2023;11(1):2244305.
- 325 14. Mahdaoui M, Kissani N. Morocco's Healthcare System: Achievements, Challenges,  
326 and Perspectives. *Cureus*. 2023;15(6):e41143.
- 327 15. Chen L, Evans T, Anand S, Boufford JI, Brown H, Chowdhury M, et al. Human  
328 resources for health: overcoming the crisis. *Lancet Lond Engl*. 2004;364(9449):1984–90.
- 329 16. Agyeman-Manu K, Ghebreyesus TA, Maait M, Rafila A, Tom L, Lima NT, et al.  
330 Prioritising the health and care workforce shortage: protect, invest, together. *Lancet Glob*  
331 *Health*. 2023;11(8):e1162–4.
- 332 17. Arksey H, O'Malley L. Scoping studies: towards a methodological framework. *Int J*  
333 *Soc Res Methodol*. 2005;8(1):19–32.
- 334 18. Levac D, Colquhoun H, O'Brien KK. Scoping studies: advancing the methodology.  
335 *Implement Sci*. 2010;5(1):69.

- 336 19. Tricco AC, Lillie E, Zarin W, O'Brien KK, Colquhoun H, Levac D, et al. PRISMA  
337 Extension for Scoping Reviews (PRISMA ScR): Checklist and Explanation. *Ann Intern Med.*  
338 2018;169:467–473.
- 339 20. Hölbl M, Kompara M, Kamišalić A, Nemeč Zlatolas L. A Systematic Review of the  
340 Use of Blockchain in Healthcare. *Symmetry.* 2018;10(10):470.
- 341 21. Dankoly US, Vissers D, El Mostafa SB, Ziyat A, Van Rompaey B, Van Royen P, et  
342 al. Perceived barriers, benefits, facilitators, and attitudes of health professionals towards type  
343 2 diabetes management in Oujda, Morocco: a qualitative focus group study. *Int J Equity*  
344 *Health.* 2023;22:29.
- 345 22. El Kirat H, Filali H. La représentation des professionnels de santé mentale sur leurs  
346 pratiques à Rabat, Maroc. *Santé Publique.* 2014;26(3):385–91. French
- 347 23. Ministry of Health. Continuing training strategy for health professionals. 2017 p. 68.  
348 French
- 349 24. Hababa H, Chakiri L, Ouakhzan B, Nairi N. Les enjeux de la formation et du  
350 développement du capital humain à l'épreuve de la régionalisation. *Int Soc Sci Manag J.* 2021  
351 Oct 13;(4). French. Available from:  
352 <https://revues.imist.ma/index.php/ISSM/article/view/28605>
- 353 25. Barich F, Chamkal N, Rezzouk B. La formation en soins infirmiers et techniques de  
354 santé dans le système licence-master-doctorat au Maroc : analyse des descriptifs de formation,  
355 étude analytique descriptive. *Rev Francoph Int Rech Infirm.* 2019 Dec 1;5(4):100183. French
- 356 26. Gouifrane R, Belaaouad S, Benmokhtar S, Radid M. La motivation des infirmiers à la  
357 participation aux actions de formation continue : une étude descriptive au niveau du pôle des  
358 urgences chirurgicales de l'hôpital Ibn-Rochd de Casablanca. *Rev Francoph Int Rech Infirm.*  
359 2018 Dec 1;4(4):e237–43. French
- 360 27. Elkachradi R, Boudallaa I, Hillali M, Kadouri A. Lifelong learning among healthcare  
361 professionals in public hospitals: Historical analysis and multiple case studies in Morocco.  
362 Bouekkadi S, Kerkeb ML, El Imrani O, Rafalia N, Zubareva O, Khouliji S, et al., editors. *E3S*  
363 *Web Conf.* 2023;412:01078.
- 364 28. Ministry of Health. Universal health coverage in Morocco: challenges for human  
365 resources. 2017 p. 33. French
- 366 29. Zouag N, Driouchi A, Achehboune A. Labor Health Shortage and Future Prospects for  
367 the Medical Workforce in Morocco. *MPRA Pap [Internet].* 2015 Apr 10 [cited 2023 Nov 2];  
368 Available from: <https://ideas.repec.org/p/pramprapa/63547.html>
- 369 30. El Mouaddib H, Sebbani M, Mansouri A, Adarmouch L, Amine M. Job satisfaction of  
370 primary healthcare professionals (public sector): A cross-sectional study in Morocco.  
371 *Heliyon.* 2023;9(9):e20357.

- 372 31. Koubri H, Hami H, Soulaymani A, El Kouartey N. Person-centred health services as a  
373 new model of the organization of primary healthcare services in Morocco. *Journal Xi'an Univ*  
374 *Archit Technol.* 2022;14(8):126-34. <https://doi.org/10.37896/JXAT14.08/315613>
- 375 32. Ministry of Health. Study of satisfaction/motivation among health professionals. 2018  
376 p. 73. French
- 377 33. El Azizi I, El Goundali. Les barrières liées à l'intégration des résultats probants dans la  
378 pratique infirmière : le point de vue d'infirmiers marocains, étude descriptive quantitative.  
379 *Rev Francoph Int Rech Infirm.* 2019;5(4):100181. French
- 380 34. Giurgiu DI, Jeoffrion C, Grasset B, Dessomme BK, Moret L, Roquelaure Y, et al.  
381 Psychosocial and occupational risk perception among health care workers: a Moroccan  
382 multicenter study. *BMC Res Notes.* 2015;8(1):408.
- 383 35. Laraqui O, Manar N, Laraqui S, Boukili M, Ghailan T, Deschamps F, et al. [Job  
384 perception and well-being among healthcare workers in Morocco]. *Sante Publique.*  
385 2017;29(6):887–95. French
- 386 36. Fattahi R, Attiya N, Fillali-Zegzouti A, El Haidani A, Bouya S, El Jaafari S, et al. Le  
387 burnout parmi le personnel des structures de santé publique de la région de Drâa-Tafilalet au  
388 Maroc. *Arch Mal Prof Environ.* 2023;84(4):101809. French
- 389 37. Mansoury O, Chamsi K, Essoli S, Mansouri A, Sebbani M, Adarmouch L, et al.  
390 L'épuisement professionnel chez le personnel de santé au centre hospitalier universitaire  
391 Mohammed VI de Marrakech – Maroc. *Arch Mal Prof Environ.* 2023;84(6):101877. French
- 392 38. Chtibi H, Ahami A, Azzaoui FZ, Khadmaoui A, Mammad K, Mottier C, et al. Study  
393 of Resistance to Stress and Burnout among Public Health Professionals: The Case of Nurses  
394 and Physicians at Ibn Sina Hospital in Rabat Morocco. *Open J Med Psychol.* 2018;7(3):34-46.
- 395 39. Endalamaw A, Khatri RB, Erku D, Nigatu F, Zewdie A, Wolka E, et al. Successes and  
396 challenges towards improving quality of primary health care services: a scoping review. *BMC*  
397 *Health Serv Res.* 2023;23(1):893.
- 398 40. Jesus TS, Landry MD, Dussault G, Fronteira I. Human resources for health (and  
399 rehabilitation): Six Rehab-Workforce Challenges for the century. *Hum Resour Health.*  
400 2017;15(1):8.
- 401 41. Kanchanachitra C, Lindelow M, Johnston T, Hanvoravongchai P, Lorenzo FM, Huong  
402 NL, et al. Human resources for health in southeast Asia: shortages, distributional challenges,  
403 and international trade in health services. *The Lancet.* 2011;377(9767):769–81.
- 404 42. Su Y, Liu MS, De Silva PV, Østbye T, Jin KZ. Health-related quality of life in  
405 Chinese workers: a systematic review and meta-analysis. *Glob Health Res Policy.* 2021;6:1-  
406 17.

- 407 43. Benton DC, Shaffer FA. Human Resources for Health 2030 and the regulatory agenda.  
408 J Nurs Manag. 2016;24(6):705–7.
- 409 44. World Health Assembly 69. Global strategy on human resources for health: workforce  
410 2030. World Health Organization; 2016.
- 411 45. Cardarelli R, Koranchelian T. Morocco’s Quest for Stronger and Inclusive Growth. In:  
412 Morocco’s Quest for Stronger and Inclusive Growth [Internet]. International Monetary Fund;  
413 2023 [cited 2023 Nov 7]. Available from:  
414 <https://www.elibrary.imf.org/display/book/9798400225406/9798400225406.xml>
- 415 46. Fourtassi M, Abda N, Bentata Y, Hajjioui A. Medical education in Morocco: Current  
416 situation and future challenges. Med Teach. 2020;42(9):973–9.
- 417 47. Massagli TL, Zumsteg JM, Osorio MB. Quality Improvement Education in Residency  
418 Training: A Review. Am J Phys Med Rehabil. 2018;97(9):673–8.
- 419 48. Tumlinson K, Jaff D, Stilwell B, Onyango DO, Leonard KL. Reforming medical  
420 education admission and training in low- and middle-income countries: who gets admitted  
421 and why it matters. Hum Resour Health. 2019;17(1):91, s12960-019-0426–9.
- 422 49. Micah AE, Solorio J, Stutzman H, Zhao Y, Tsakalos G, Dieleman JL. Development  
423 assistance for human resources for health, 1990–2020. Hum Resour Health. 2022;20(1):51.
- 424 50. Hachoumi N, Eddabbah M, El Adib AR. Health sciences lifelong learning and  
425 professional development in the era of artificial intelligence. Int J Med Inf. 2023;178:105171.
- 426 51. O’Malley G, Perdue T, Petracca F. A framework for outcome-level evaluation of in-  
427 service training of health care workers. Hum Resour Health. 2013;11(1):50.
- 428 52. Frenk J, Chen L, Bhutta ZA, Cohen J, Crisp N, Evans T, et al. Health professionals for  
429 a new century: transforming education to strengthen health systems in an interdependent  
430 world. The Lancet. 2010;376(9756):1923–58.
- 431 53. Tsiachristas A, Wallenburg I, Bond CM, Elliot RF, Busse R, van Exel J, et al. Costs  
432 and effects of new professional roles: Evidence from a literature review. Health Policy Amst  
433 Neth. 2015;119(9):1176–87.
- 434 54. World Health Organization. WHO health workforce support and safeguards list 2023  
435 [Internet]. World Health Organization; 2023 Mar [cited 2023 Nov 8]. Available from:  
436 <https://www.who.int/publications-detail-redirect/9789240069787>
- 437 55. Sylla A, El Ouidih S, Barknan K, Hassoune S, Nani S. Migration intention of final  
438 year medical students. Eur J Public Health. 2021;31(Supplement\_3):ckab165.448.



- 439 56. Niskala J, Kanste O, Tomietto M, Miettunen J, Tuomikoski AM, Kyngäs H, et al.  
440 Interventions to improve nurses' job satisfaction: A systematic review and meta-analysis. *J*  
441 *Adv Nurs*. 2020;76(7):1498–508.
- 442 57. Rowan BL, Anjara S, De Brún A, MacDonald S, Kearns EC, Marnane M, et al. The  
443 impact of huddles on a multidisciplinary healthcare teams' work engagement, teamwork and  
444 job satisfaction: A systematic review. *J Eval Clin Pract*. 2022;28(3):382–93.
- 445 58. Aloisio LD, Coughlin M, Squires JE. Individual and organizational factors of nurses'  
446 job satisfaction in long-term care: A systematic review. *Int J Nurs Stud*. 2021;123:104073.
- 447 59. Tenaw Z, Siyoum M, Tsegaye B, Werba TB, Bitew ZW. Health Professionals Job  
448 Satisfaction and Associated Factors in Ethiopia: A Systematic Review and Meta-analysis.  
449 *Health Serv Res Manag Epidemiol*. 2021;8:23333928211046484.
- 450 60. Nowrouzi B, Lightfoot N, Larivière M, Carter L, Rukholm E, Schinke R, et al.  
451 Occupational Stress Management and Burnout Interventions in Nursing and Their  
452 Implications for Healthy Work Environments: A Literature Review. *Workplace Health Saf*.  
453 2015;63(7):308–15.
- 454 61. Gupta J, Patwa MC, Khuu A, Creanga AA. Approaches to motivate physicians and  
455 nurses in low- and middle-income countries: a systematic literature review. *Hum Resour*  
456 *Health*. 2021;19(1):4.
- 457 62. Tak HJ, Curlin FA, Yoon JD. Association of Intrinsic Motivating Factors and Markers  
458 of Physician Well-Being: A National Physician Survey. *J Gen Intern Med*. 2017;32(7):739–  
459 46.
- 460 63. Friganović A, Selič P, Ilić B, Sedić B. Stress and burnout syndrome and their  
461 associations with coping and job satisfaction in critical care nurses: a literature review.  
462 *Psychiatr Danub*. 2019;31(Suppl 1):21–31.
- 463 64. Zhang YY, Zhang C, Han XR, Li W, Wang YL. Determinants of compassion  
464 satisfaction, compassion fatigue and burn out in nursing: A correlative meta-analysis.  
465 *Medicine (Baltimore)*. 2018;97(26):e11086.
- 466 65. Salvagioni DAJ, Melanda FN, Mesas AE, González AD, Gabani FL, Andrade SMD.  
467 Physical, psychological and occupational consequences of job burnout: A systematic review  
468 of prospective studies. *PloS one*. 2017;12(10):e0185781.
- 469 66. Rink LC, Oyesanya TO, Adair KC, Humphreys JC, Silva SG, Sexton JB. Stressors  
470 Among Healthcare Workers: A Summative Content Analysis. *Glob Qual Nurs Res*.  
471 2023;10:23333936231161127.
- 472 67. De Simone S, Vargas M, Servillo G. Organizational strategies to reduce physician  
473 burnout: a systematic review and meta-analysis. *Aging Clin Exp Res*. 2021;33(4):883–94.



- 474 68. Molina-Praena J, Ramirez-Baena L, Gómez-Urquiza JL, Cañadas GR, De la Fuente  
475 EI, Cañadas-De la Fuente GA. Levels of Burnout and Risk Factors in Medical Area Nurses: A  
476 Meta-Analytic Study. *Int J Environ Res Public Health*. 2018;15(12):2800.
- 477 69. Panagioti M, Geraghty K, Johnson J, Zhou A, Panagopoulou E, Chew-Graham C, et  
478 al. Association Between Physician Burnout and Patient Safety, Professionalism, and Patient  
479 Satisfaction: A Systematic Review and Meta-analysis. *JAMA Intern Med*.  
480 2018;178(10):1317–31.
- 481 70. Regehr C, Glancy D, Pitts A, LeBlanc VR. Interventions to reduce the consequences  
482 of stress in physicians: a review and meta-analysis. *J Nerv Ment Dis*. 2014;202(5):353–9.
